# Supplementary material for: Facile fabrication of composite film modified electrodes based on vanadium-substituted tungstophosphate with Fe3O4@Au for electrochemical detection of sodium nitrite
Source: Royal Society of Chemistry journal article supplement (doi:10.1039/d3nj05810g), 2024-01-01
Supplement: d3nj05810g1.pdf [file d3nj05810g1.pdf]

## Supporting information Material

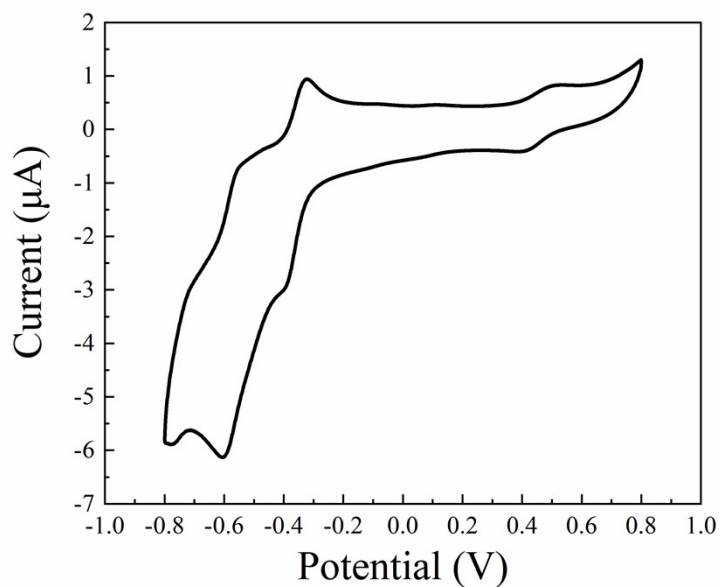

**Fig. S1** CV curve of P<sub>2</sub>W<sub>17</sub>V in NaAC-AC (pH = 4) solution.

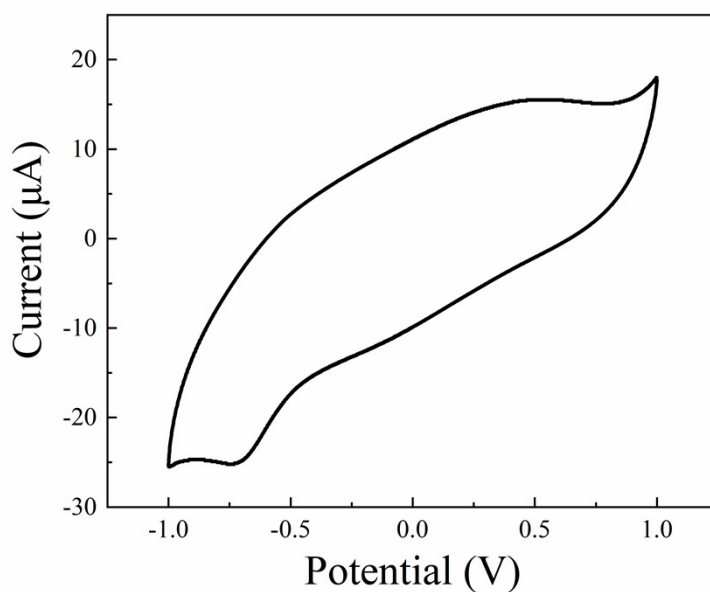

**Fig. S2** CV curve of Fe<sub>3</sub>O<sub>4</sub>@Au in 0.01 M PBS (pH = 7) solution.
